# Supplementary material for: Gene-edited stem cells enable CD33-directed immune therapy for myeloid malignancies
Source: PubMed Central journal article supplement — Proc Natl Acad Sci U S A. 2019 May 28;116(24):11978–87. doi: 10.1073/pnas.1819992116 (PMC6575599; doi:10.1073/pnas.1819992116), 2019-05-28
Supplement: pnas.1819992116.sapp.pdf [file pnas.1819992116.sapp.pdf]

## Supplementary Information for

Gene-edited stem cells enable CD33-directed Immune therapy for myeloid malignancies

Florence Borot<sup>a,1,2</sup>, Hui Wang<sup>b</sup>, Yan Ma<sup>a</sup>, Toghrul Jafarov<sup>a</sup>, Azra Raza<sup>a,c</sup>, Abdullah Mahmood Ali<sup>a,c,1,2</sup> and Siddhartha Mukherjee<sup>a,c,1,2</sup>

Siddhartha Mukherjee  
Email: sm3252@columbia.edu

### **This PDF file includes:**

Supplementary text  
o Materials and Methods  
Figs. S1 to S5  
Tables S1 to S4

## **Supplementary Text Materials and Methods**

### **Cell line and primary human cells**

The Immortalized human acute myeloid cell line, HL-60 was obtained from ATCC and cultured in IMDMEM with 20% Fetal Bovine Serum and 1% Penicillin Streptomycin. In order to follow leukemia engraftment and progression over time, the HL-60 cells were transduced with lentiviral particles expressing a dTomato fluorescent protein under an EF1 $\alpha$  promoter. The lentivirus vector and particles were produced by Vectalys (Toulouse, France).

Human Bone Marrow or Cord Blood CD34<sup>+</sup> stem cells were purchased from StemExpress (Folsom, CA, USA) and maintained in StemSpan SFEM II (STEMCELL technologies inc) containing 1% Penicillin Streptomycin, 100ng/mL TPO, 100ng/mL SCF, 100 ng/mL IL6 and 100ng/mL FLT3L and UM171 0.35 nM (Xcessbio, San Diego, CA, USA). All human cytokines were purchased from Biolegend (San Diego, CA, USA).

Human T cells were purified from fresh peripheral blood normal donor leukopaks purchased from the New York Blood Center. Briefly, the leukopak was diluted with 2-4 volumes of Phosphate Buffered Saline (1X) supplemented with 2 mM EDTA, store at 4C. Then 35 mL of diluted leukopak was carefully layered on 15 mL of Ficoll-Paque<sup>TM</sup> Premium (GE) and centrifuged at 400g, 30 mins at 25°C, in swinging rotor buckets. The layer of mono nuclear cells was then transferred to a new tube, diluted 1:1 with PBS (1X) containing 2mM EDTA and centrifuged 400g, 15 mins at 25°C. The red blood cells of the pellet were then removed with 1X ACK lysis buffer (Gibco), incubated 5-8 mins at RT, washed with PBS (1X) containing 2mM EDTA and centrifuged again 400g, 10 mins at 25°C. The CD4<sup>+</sup> and CD8<sup>+</sup> T cells were then positively selected from the mono nuclear cells pellet with Miltenyi Biotec CD4<sup>+</sup> and CD8<sup>+</sup> microbeads, following manufacturer protocols. The CD4<sup>+</sup> and CD8<sup>+</sup> T cells were then activated the same day using CD3/CD28 dynabeads 1:1 bead to cell ratio (Gibco) and expanded separately in the Gibco OpTmizer<sup>TM</sup> CTS<sup>TM</sup> T-Cell Expansion SFM medium containing IL7 10ng/mL and IL15 5ng/mL.

### **CAR constructs, lentiviral production, and transduction**

The anti-CD33 Chimeric Antigen Receptor was generated by cloning the light and heavy chain of the humanized anti-human CD33 scFv (clone My96) fused in frame, to the CD8 alpha hinge domain, the CD8 transmembrane domain, the 4-1BB signaling domain and the CD3zeta intracellular domain into the lentiviral plasmid pHIV-Zsgreen, a gift from Bryan Welm & Zena Werb (Addgene plasmid # 18121). All cDNA fragments were codon optimized and synthesized by GeneArt (Regensburg, Germany). The lentiviral particles were produced by Vectalys (Toulouse, France). 24 hours after activation, CD4<sup>+</sup> T cells were transduced with lentiviral particles at an MOI=30 and in parallel, CD8<sup>+</sup> T cells at an MOI=40.

### ***In vitro* cytotoxicity assays**

Effector sorted CAR-T cells stably expressing zsGreen were mixed at a different ratio with the following target cells HL-60 stably expressing dTomato and or CD34<sup>+</sup>CD33<sup>WT</sup> cells stained with Celltrace blue and or CD34<sup>+</sup>CD33<sup>Del</sup> stained with Celltrace Violet (Invitrogen). 16 to 24 hours after incubation, using 7AAD or Sytox Red as a viability dye, data were acquired with the BioRad ZE5 flow cytometry analyzer in high-throughput mode in order to assess cytotoxicity. After subtracting the spontaneous lysis in negative control, CART33 cells specific cytotoxicity (%) was calculated as cells positive for both CFSE and 7-AAD or Sytox Red with the following formula: ((% positive cells with CART33)- (% positive cells with control T cells))/(100- ((% positive cells with control T cells)) x 100.

### ***In vitro* phagocytosis assays**

CD34<sup>+</sup>CD33<sup>WT</sup> cells or CD34<sup>+</sup>CD33<sup>Del</sup> were differentiated into monocytes for 14 days, with StemSpan SFEM II containing 1% Penicillin Streptomycin and the StemSpan Myeloid Expansion Supplement II (100X). At day 15, differentiated monocytes were preincubated for 30 mins with PBS or 25uM Cytochalasin D and then incubated with pHrodo red E coli bioparticles (thermofisher) with or without 25uM cytochalasin D for 1h30 mins. Cells were then transferred to FACS tubes, washed with PBS-FBS and incubated 10 mins at RT with Human TruStain FcX and True-Stain Monocyte blocker (Biolegend). Antibodies mix containing CD14-APC/Cy7, CD13-BV786, CD33-APC and ebioscience fixable viability dye e450 was then added directly. After 25 mins of incubation, cells were washed and phagocytosis was assessed by FACS.

### **LPS induced cytokine assay**

For LPS induced innate immune response assessment, 8 weeks after injection of CD34<sup>+</sup>CD33<sup>WT</sup> or CD34<sup>+</sup>CD33<sup>Del</sup> cells, NSGS mice received 15ugr of LPS (from E coli O26:B6, Sigma) intraperitoneally. Plasma was collected in EDTA tube at t=0 and 4h30 after injection. Cytokines level was measured using Legendplex human cytokine panel from Biolegend, following manufacturer instructions.

### ***In vivo* Phagocytosis assay**

For *in vivo* phagocytosis, mice received 150uL of pHrodo red E coli bioparticles (thermofisher) via i.v. and were sacrificed 2 hours after for peritoneal cavity analysis.

### **Statistics**

All statistics were performed using Graphpad Prism 7. For continuous variables, an unpaired two tailed t-test was performed. Differences between means were considered significant when the p value is <0.05, else not significant (ns; p>0.05).

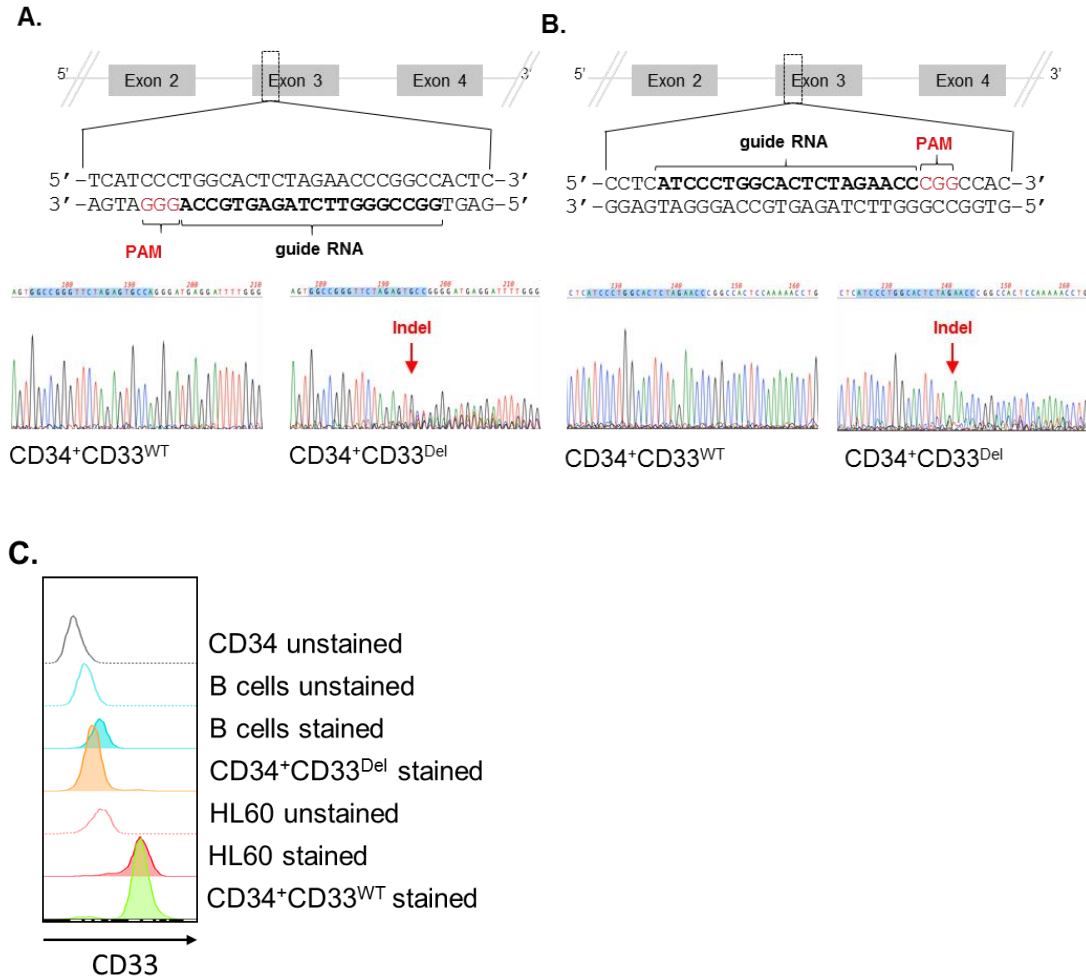

**Fig. S1. Additional sgRNA tested to ablate CD33 expression show high level of indels. (A & B) and expression of CD33 on gene-edited and unedited cells (C). A & B** Schematic representation of CD33 genomic locus showing exon 2-4 and location and sequence of two additional sgRNA targeting CD33 locus. Chromatogram at the bottom are screenshot of Sanger sequencing showing a region surrounding the DNA double strand break site, left: CD34<sup>+</sup>CD33<sup>WT</sup> cells and right: CD34<sup>+</sup>CD33<sup>Del</sup>. Guide sequences are highlighted in blue on the chromatogram and appearance of indels is indicated by red downward arrow.

**C. CD33 expression on CD34<sup>+</sup> cells, HL60 AML cells and B cells and CD34<sup>+</sup>CD33<sup>Del</sup> cells.** CD33 expression was determined by flow cytometry. Dotted lines indicate unstained cells, filled histogram show cells stained with CD33 antibody. CD34<sup>+</sup>CD33<sup>Del</sup> cells show overlap with the B cells (negative control for CD33 expression) and virtually no overlap with the CD34<sup>+</sup>CD33<sup>WT</sup> and HL-60 cells positive control) suggesting efficient CD33 deletion.

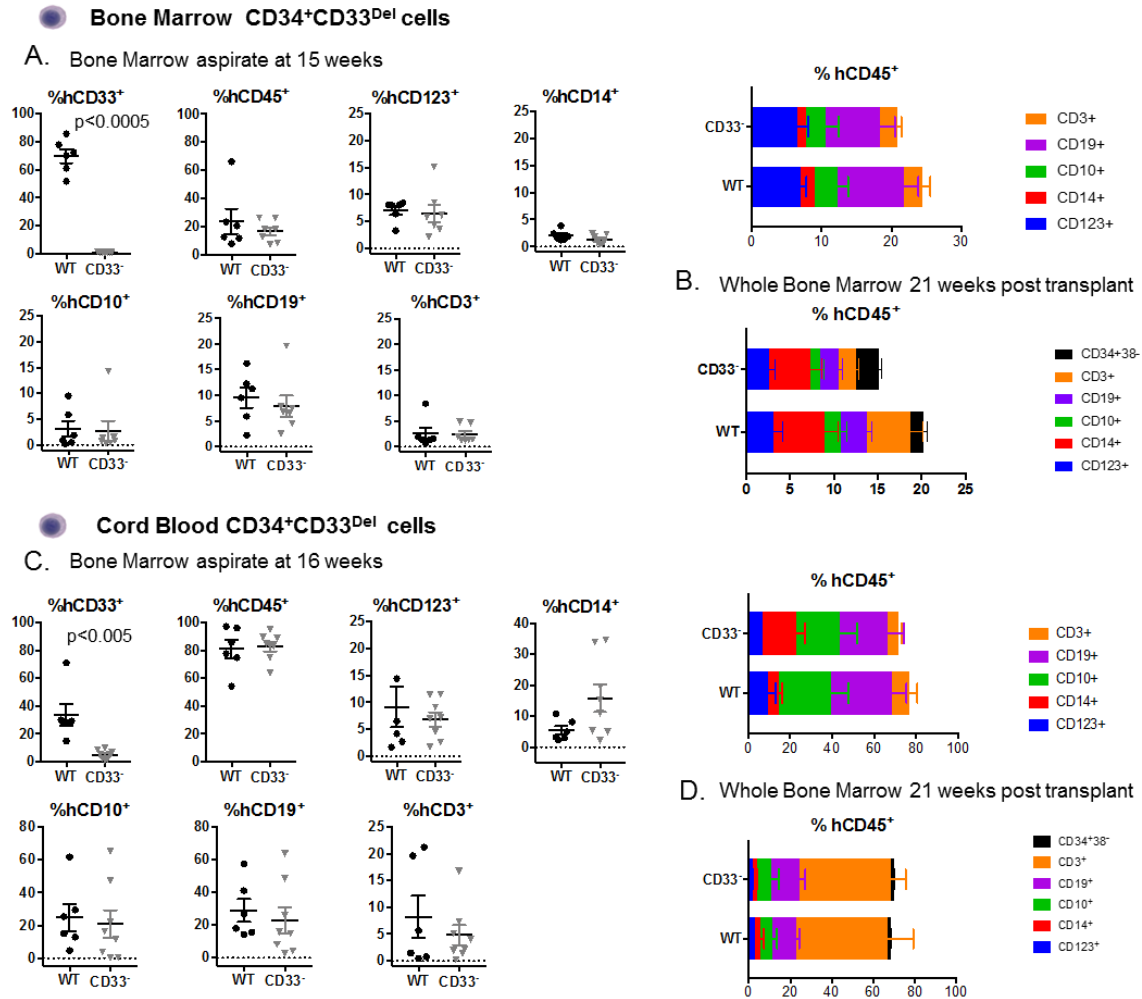

**Fig. S2. Deletion of CD33 does not impair engraftment and hematopoietic repopulation in NSGM3 mice. (A-B) Bone marrow derived CD34<sup>+</sup> cells engraftment and repopulation: (A)** Bone marrow aspirate (15 weeks) post-transplant analyzed for cells of various lineages, as indicated. CD34<sup>+</sup>CD33<sup>Del</sup> cells show same engraftment (CD45<sup>+</sup>) as control cells as well as comparable percentage of mature myeloid and lymphoid cells. The bar diagram represents summary of individual panels. **(B)** Summary of data from main Fig. 2C. **(C to D) Cord blood derived CD34<sup>+</sup> cells engraftment and repopulation: (C)** Bone marrow aspirate (16 weeks) post-transplant analyzed for cells of various lineages, as indicated. CD34<sup>+</sup>CD33<sup>Del</sup> cells show same engraftment (CD45<sup>+</sup>) as control cells as well as comparable percentage of mature myeloid and lymphoid cells. The bar diagram represents summary of individual panels. **(D)** Summary of data from main Fig 2E. No significant differences were observed between both groups in all cell types analyzed ( $p > 0.05$ ), unpaired t test. All data are represented as mean  $\pm$  SEM.

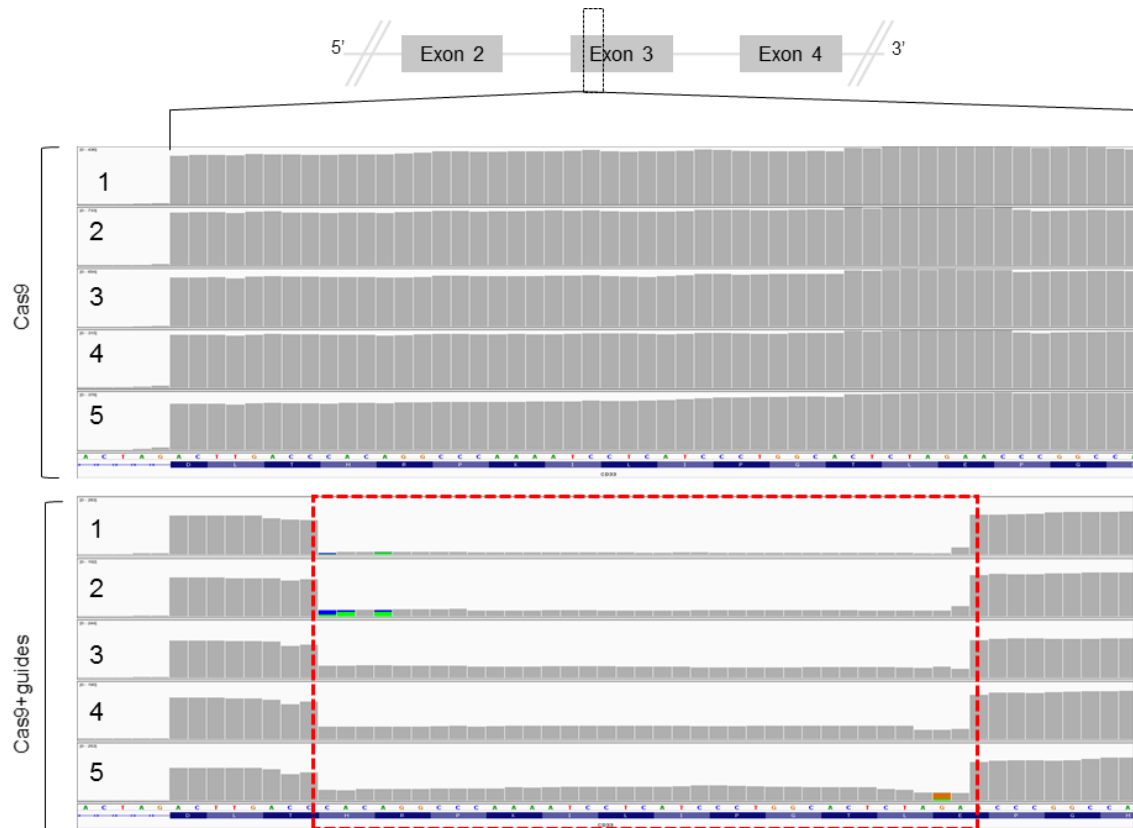

**Fig. S3. Coverage of reads in RNAseq data.** Integrated genomic viewer (IGV) screenshot of coverage track showing CD33 genomic regions surrounding the guides in Cas9+sgRNA (n=5; bottom) and Cas9 only (n=5; top) cells as indicated in the left. The grey bars in the coverage track (indicated on right) show the depth of the reads displayed at each locus. Generally, the coverage should be uniform and hence the bar height should be same but deletions results in dip in the height of the bars, marked by a red dotted rectangle in lower panel.

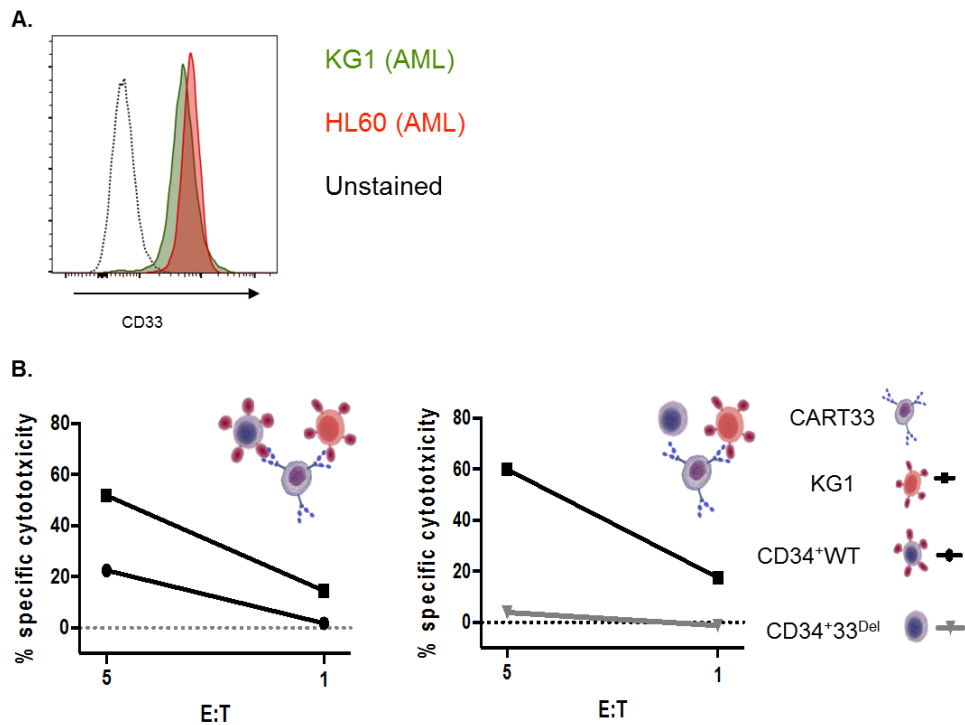

**Fig. S4. Cytotoxicity of CART33 over AML derived KG1 cells (A)** CD33 expression was measured and found to be relatively less on KG1 cells compared to HL-60 cells. **(B)** CART33 cells or control T were incubated with KG1 and CD34+CD33WT or CD34+CD33Del at two different effector (E) to target (T) ratio (E:T). Cytotoxicity was assessed by flow cytometry and percent specific cytotoxicity was measured. We saw a CD33-antigen dependent cytotoxicity of KG1 cells.

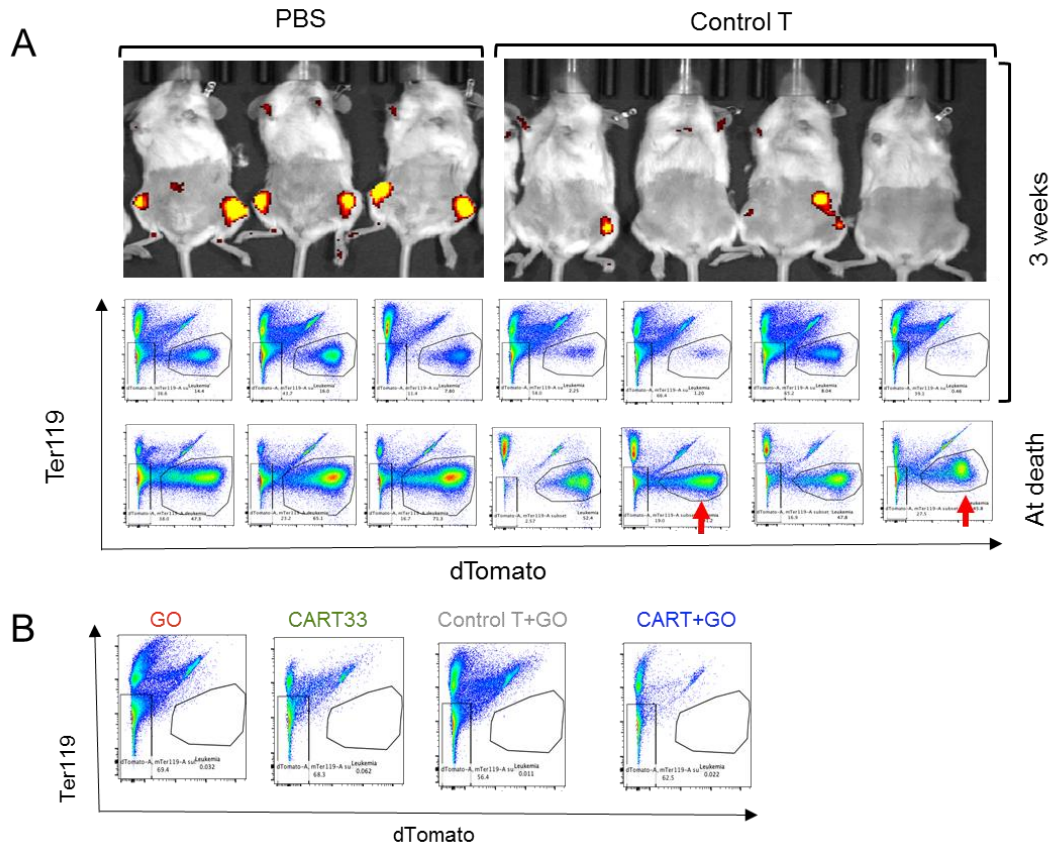

**Fig. S5. Therapy model: CD34<sup>+</sup>CD33<sup>Del</sup> cells resist CD33-targeted immunotherapy.** **(A)** Leukemia burden in control groups of mice at 3 weeks (Top panel: imaging and bottom panel: flow cytometry of bone marrow aspirate) and 8 weeks (Flow cytometry dot plots) Leukemia cells were gated on Ter119<sup>+</sup>dTomato<sup>+</sup>. **(B)** Representative flow cytometry dot plot from one mice showing absence of leukemia burden in treated groups.



**Table S1.** Summary of reads and variants found in whole genome sequencing.

|                                | <b>Cas9</b> |                        |                       | <b>Cas9+sgRNA</b> |                        |                       |
|--------------------------------|-------------|------------------------|-----------------------|-------------------|------------------------|-----------------------|
| Total PF Reads                 | 629,724,054 |                        |                       | 659,744,702       |                        |                       |
| Percent Q30 Bases              | 93.46%      |                        |                       | 93.43%            |                        |                       |
|                                | <b>SNVs</b> | <b>Insertion<br/>s</b> | <b>Deletion<br/>s</b> | <b>SNVs</b>       | <b>Insertion<br/>s</b> | <b>Deletion<br/>s</b> |
| <b>Small Variants Summary</b>  |             |                        |                       |                   |                        |                       |
| Total Passing                  | 3,743,126   | 401,796                | 418,883               | 3,744,331         | 401,386                | 418,187               |
| Percent Found in dbSNP         | 94.24%      | 85.75%                 | 86.70%                | 94.25%            | 85.82%                 | 86.89%                |
| Het/Hom Ratio                  | 1.613       | 2.008                  | 2.358                 | 1.614             | 2                      | 2.343                 |
| Ts/Tv Ratio                    | 2.063       | -                      | -                     | 2.063             | -                      | -                     |
| <b>Variants by Consequence</b> |             |                        |                       |                   |                        |                       |
| Frameshifts                    | -           | 58                     | 67                    | -                 | 57                     | 67                    |
| Non-synonymous                 | 10,248      | 144                    | 192                   | 10,300            | 157                    | 191                   |
| Synonymous                     | 11,638      | -                      | -                     | 11,625            | -                      | -                     |
| Stop Gained                    | 77          | 6                      | 0                     | 77                | 6                      | 0                     |
| Stop Lost                      | 19          | 0                      | 1                     | 19                | 0                      | 1                     |

**Table S2.** Off-target sites for sgRNA 846 (sgRNA: **AUCCUGGCACUCUAGAACC**; PAM: **CGG**). No indels were found within 100 bp of the expected off-target cut site in whole genome sequencing analysis. Mismatch with guide sequence is denoted in red.

| OFF TARGET SITE      | MISMATCHES | CHROMOSOME | CUT SITE    | PAM | GENE        | Indels |
|----------------------|------------|------------|-------------|-----|-------------|--------|
| ATCCCTGGCACTCAGGAGCC | 3          | chr9       | 129,640,094 | AGG | ASB6        | None   |
| AACCCTGGCTCTCTAAACC  | 3          | chr12      | 112,995,250 | AGG | RP1-71H24.1 | None   |
| ATCCCTGGCACCTGGCACC  | 3          | chr14      | 99,627,517  | TGG |             | None   |
| ATCCCTGGCACTCCAGGGCC | 3          | chr17      | 9,253,589   | TGG | STX8        | None   |
| AGCCCTGGCAGTCTGGAACC | 3          | chr8       | 52,941,254  | TGG |             | None   |
| ATCCCAGGCCCTCTATAACC | 3          | chr1       | 236,691,946 | TGG | ACTN2       | None   |
| ATCCATGGTACTCTGGAACC | 3          | chr22      | 35,609,583  | AGG | MB          | None   |
| AACCCAGGCACTCTAGCACC | 3          | chr2       | 203,480,837 | AGG | RAPH1       | None   |
| ACCCCTAGCACTCTAGAGCC | 3          | chr1       | 26,560,691  | AGG | RPS6KA1     | None   |
| ACCCCTGGCAGTCTAGAGCC | 3          | chr4       | 25,435,756  | AGG |             | None   |
| ATCCCTGACACTCTGGGACC | 3          | chr12      | 3,595,172   | TGG |             | None   |
| AGCCCTCGCACTCTGGAACC | 3          | chr14      | 74,598,895  | AGG | LTBP2       | None   |
| ATCTCTGGCAGACTAGAAC  | 3          | chr5       | 94,207,405  | AGG | KIAA0825    | None   |
| ACCCCTGACACTCTAGAAAG | 4          | chr16      | 57,399,318  | AGG |             | None   |
| ATCCCTGGCACACTGGGCC  | 4          | chr2       | 106,853,582 | AGG | ST6GAL2     | None   |
| ATCACTGTCTCCCTAGAAC  | 4          | chr9       | 125,259,035 | TGG |             | None   |
| ATCCCTGACCTCCAGAACA  | 4          | chr9       | 131,545,888 | TGG | RP11-40A7.2 | None   |
| ACCCCTGGCTCCCTAGAGCC | 4          | chr10      | 125,810,087 | TGG | UROS        | None   |
| CTGCCTGGCTCTCTAGCACC | 4          | chr11      | 205,054     | TGG | BET1L       | None   |
| GTCTCTGGCACTCTAGGCC  | 4          | chr11      | 2,689,716   | AGG | KCNQ1       | None   |

**Table S3.** Off-target sites for sgRNA 811 (sgRNA: **CCUCACUAGACUUGACCCAC**; PAM: **AGG**). No indels were found within 100 bp of the expected off-target cut site in whole genome sequencing analysis. Mismatch with guide sequence is denoted in red.

| OFF TARGET SITE                        | MISMATCHES | CHROMOSOME | CUT SITE    | PAM | GENE      | Indels |
|----------------------------------------|------------|------------|-------------|-----|-----------|--------|
| CCTCAC <b>AAGATT</b> AGACCCAC          | 3          | chr12      | 86,341,556  | TGG | MGAT4C    | None   |
| <b>T</b> CTCACT <b>GGCCT</b> TGACCCAC  | 3          | chr9       | 134,687,890 | TGG | COL5A1    | None   |
| CCTCACT <b>GGACTTGACTCAG</b>           | 3          | chr1       | 209,621,235 | GGG | LAMB3     | None   |
| CCTCACT <b>GGACAAG</b> ACCCAC          | 3          | chr12      | 19,574,394  | TGG | AEBP2     | None   |
| CCTCACTAGACT <b>AGATCCAT</b>           | 3          | chr9       | 973,903     | TGG |           | None   |
| CCTC <b>CG</b> TAGC <b>CTT</b> TACCCAC | 3          | chr7       | 157,876,963 | AGG | PTPRN2    | None   |
| CCTCAC <b>AAGACAAG</b> ACCCAC          | 3          | chr8       | 62,858,829  | TGG | NKAIN3    | None   |
| <b>CT</b> TCAC <b>CAGCCT</b> TGACCCAC  | 3          | chr19      | 51,125,605  | AGG | SIGLEC9   | None   |
| CCTCAC <b>CAGCCCT</b> TGACCCAC         | 3          | chr19      | 51,143,004  | AGG | SIGLEC7   | None   |
| <b>CT</b> TCAC <b>CAGCCT</b> TGACCCAC  | 3          | chr19      | 51,144,414  | AGG | SIGLEC7   | None   |
| CCTCAC <b>CAGCCCT</b> TGACCCAC         | 3          | chr19      | 51,185,448  | AGG | SIGLEC20P | None   |
| CCTCAC <b>CAGCCCT</b> TGACCCAC         | 3          | chr19      | 51,211,800  | AGG | SIGLEC22P | None   |
| CCTCAC <b>CAGCCCT</b> TGACCCAC         | 3          | chr19      | 51,501,106  | AGG | SIGLEC12  | None   |
| CCTCAC <b>CAGCCCT</b> TGACCCAC         | 3          | chr19      | 51,509,057  | AGG | SIGLEC27P | None   |
| CCTCAC <b>CAGCCCT</b> TGACCCAC         | 3          | chr19      | 51,530,952  | AGG | SIGLEC6   | None   |
| <b>TC</b> CACT <b>GGCCT</b> TGACCCAC   | 4          | chr9       | 130,997,236 | TGG |           | None   |
| CCT <b>T</b> ACTAG <b>CCTCC</b> ACCCAC | 4          | chr5       | 127,098,351 | GGG |           | None   |
| CCTCAC <b>AAGATAAG</b> ACCCAC          | 4          | chr2       | 223,246,492 | TGG |           | None   |
| CCT <b>A</b> ACTAG <b>AATTGCC</b> ACAC | 4          | chr2       | 228,144,164 | AGG | SPHKAP    | None   |
| CCTC <b>TATATACTTGT</b> CCAC           | 4          | chr1       | 46,408,719  | AGG | FAAH      | None   |

**Table S4.** List of genes differentially expressed in CD33 deleted cells. Genes whose expression is low in CD33 deleted cells compared to CD33 wildtype cells are indicated by negative sign.

| Gene       | log2 Fold |             | padj  | Description                                                  |
|------------|-----------|-------------|-------|--------------------------------------------------------------|
|            | Change    | pvalue      |       |                                                              |
| CD33       | -0.837    | 0.000455048 | 0.999 | Myeloid cell surface antigen CD33                            |
| CDON       | 1.033     | 0.009579405 | 0.999 | Cell adhesion molecule-related                               |
| AC027279.1 | 0.824     | 0.01015653  | 0.999 | Non-coding RNA                                               |
| LDLR       | -0.563    | 0.012597131 | 0.999 | Low-density lipoprotein receptor                             |
| PRAME      | -0.87     | 0.016800466 | 0.999 | Melanoma antigen preferentially expressed in tumors          |
| INSIG1     | -0.494    | 0.017206864 | 0.999 | Insulin-induced gene 1 protein                               |
| HMGB1P31   | -0.797    | 0.022454929 | 0.999 | Non-coding RNA                                               |
| AP005019.1 | -1.261    | 0.032232654 | 0.999 | Non-coding RNA                                               |
| PCLAF      | 0.382     | 0.035486149 | 0.999 | PCNA-associated factor;PCLAF                                 |
| CD22       | -0.76     | 0.03640001  | 0.999 | B-cell receptor CD22                                         |
| TPTE2      | 0.712     | 0.037739962 | 0.999 | Phosphatidylinositol 3,4,5-trisphosphate 3-phosphatase TPTE2 |
| ZNF469     | 0.811     | 0.039222723 | 0.999 | Zinc finger protein 469                                      |
| SVOPL      | -0.867    | 0.04599215  | 0.999 | Putative transporter SVOPL                                   |
| FFAR4      | 0.678     | 0.046205968 | 0.999 | Free fatty acid receptor 4                                   |
